# Supplementary material
Source: ML conference proceedings conference paper supplement (https://openaccess.thecvf.com/content/CVPR2024/html/Liang_Deep_Generative_Model_CVPR_2024_paper.html)
Supplement: Supplementary file 1 [file Liang_Deep_Generative_Model_CVPR_2024_supplemental.pdf]

# Deep Generative Model based Rate-Distortion for Image Downscaling Assessment Supplementary Material

Yuanbang Liang<sup>1</sup>   Bhavesh Garg<sup>2</sup>   Paul Rosin<sup>1</sup>   Yipeng Qin<sup>1</sup>

<sup>1</sup>School of Computer Science and Informatics, Cardiff University   <sup>2</sup>IIT Bombay & WadhvaniAI  
{liangy32, rosinpl, qiny16}@cardiff.ac.uk, bh05avesh@gmail.com

## 1. Time Complexity

Table 1. Running times of our IDA-RD with PULSE and SRFlow as  $f_{us}$  (Eq. 2 in the main paper) respectively.  $N_X$ : the number of images in test dataset  $X$  in Eq. 2 in the main paper.

| $N_X$  | 300     | 600     | 900     |
|--------|---------|---------|---------|
| PULSE  | 3h08min | 6h10min | 9h08min |
| SRFlow | 18min   | 35min   | 55min   |

Table 1 shows the running times of our IDA-RD measure using PULSE and SRFlow as  $f_{us}$  (Eq. 2 in the main paper) on an Nvidia RTX3090 GPU, respectively. It can be observed that the SRFlow implementation runs much faster, which justifies our choice of using it in our IDA-RD measure.

## 2. Examples of Downscaled Images used in our experiments

Table 6 and Table 7 show examples of images downscaled by synthetic and real-world image downscaling methods used in our experiments, respectively.

## 3. Additional Results for Different Types of Degradations

As Table 2 shows, we tested our IDA-RD using BSRGAN’s more complex Type IV degradations. It can be observed that our IDA-RD remains effective across these additional degradation types.

Table 2. IDA-RD scores for synthetic image downscaling methods used in BSRGAN. The random degradation parameters for [G.N. levels, blur  $\sigma$ , JPEG noise] are: Random-1: [0.667, 0.026, 48]; Random-2: [0.824, 1.233, 75]; Random-3: [0.283, 1.719, 49]; Random-4: [0.404, 0.233, 35]; and Random-5: [0.771, 1.902, 50].

|         | Random-1    | Random-2    | Random-3    | Random-4     | Random-5     |
|---------|-------------|-------------|-------------|--------------|--------------|
| Type IV | 0.537±0.002 | 0.820±0.004 | 0.410±0.001 | 0.0480±0.001 | 0.548 ±0.001 |

## 4. Balancing FFHQ into Age-, Gender-, and Race-Balanced Subsets

We balance the FFHQ dataset [16] into subsets (*i.e.*,  $X$  in Eq. 2 in the main paper) that are balanced in age, gender and ethnicity for a fair evaluation of our IDA-RD measure. For

the gender and age labels of FFHQ images, we use those offered by the FFHQ-features-dataset<sup>5</sup>; for the ethnicity labels of FFHQ images, we use the recognition results of DeepFace<sup>6</sup>. According to the above, we define i) four age groups: Minors (0-18), Youth (19-36), Middle Aged (36-54) and Seniors (54+); ii) three major ethnic groups: Asian, White and Black; iii) two gender groups: Male and Female. We apply K-means to cluster FFHQ images in 24 ( $4 \times 3 \times 2$ ) groups and select images from them evenly to generate the subsets used in our experiments. As Table 8 shows, the subsets used in our experiments are highly-balanced in terms of age, gender and ethnicity.

## 5. IDA-RD Based on Stable Diffusion (SD)

As Table 3 shows, implementing our IDA-RD metric with SD models produces the same ranking as PULSE and SRFlow, further validating the effectiveness of our method.

## 6. Validation Using “Camera” Images

The results in Table 4 show the same ranking of image downscaling algorithms by our IDA-RD metric, further validating the correctness of our approach. Notably, our method is superior as it does not require any reference images (*e.g.*, “camera” images).

## 7. IDA-RD Results on Lanczos Algorithm

As Table 4 and Table 5 show, the Lanczos algorithm loses slightly more information than the Bicubic and Bilinear algorithms, but less than the SOTA methods. This reflects a trend to sacrifice some information preservation for improved perceptual quality in image downscaling.

## 8. Results of SRFlow ( $8 \times$ ) on Real-world Datasets (Unstable)

As Fig. 1 shows, SRFlow becomes unstable for a scaling factor of  $8 \times$ . For stable uses of SRFlow, we intentionally used domain-specific datasets in the main paper. Note that all state-of-the-art image downscaling methods (*i.e.*, Perceptual, L0-regularized, DPID) used in our experiments are general ones that are applicable to all domains (*i.e.*, not tuned for specific domains).

<sup>5</sup><https://github.com/DCGM/ffhq-features-dataset>

<sup>6</sup><https://github.com/serengil/deepface>

Table 3. Results of IDA-RD implementations using three SD-based methods: ResShift [47] and Diffbir [22], StableSR [39].

|                          | Bicubic           | Bilinear          | N.N.              | DPID              | Perceptual        | $L_0$ -reg.       |
|--------------------------|-------------------|-------------------|-------------------|-------------------|-------------------|-------------------|
| ResShift( $\times 100$ ) | $0.349 \pm 0.081$ | $0.343 \pm 0.097$ | $0.553 \pm 0.329$ | $0.356 \pm 0.086$ | $0.537 \pm 0.201$ | $0.483 \pm 0.129$ |
| Diffbir( $\times 100$ )  | $0.340 \pm 0.167$ | $0.333 \pm 0.163$ | $0.703 \pm 0.353$ | $0.313 \pm 0.136$ | $0.681 \pm 0.217$ | $0.437 \pm 0.192$ |
| StableSR( $\times 100$ ) | $0.680 \pm 0.243$ | $0.650 \pm 0.226$ | $0.773 \pm 0.341$ | $0.697 \pm 0.252$ | $0.739 \pm 0.274$ | $0.698 \pm 0.187$ |

Figure 1. SRFlow becomes unstable for a scaling factor of  $8\times$  on real-world datasets, *e.g.*, DIV2K (Row 1), while such cases never happen for domain-specific datasets, *e.g.*, FFHQ (Row 2). From the left to right, the method to down scaling are N.N., DPID, Perceptual and  $L_0$ -reg. separately.

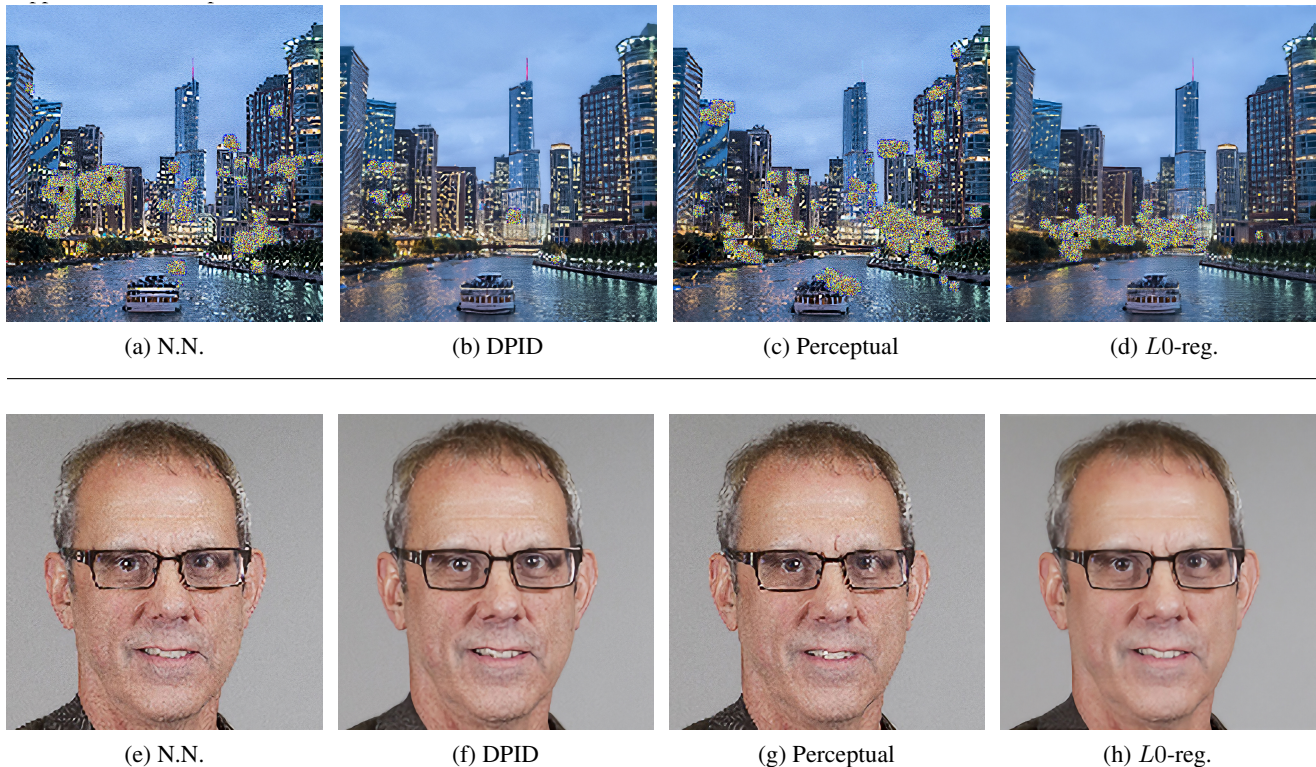

Table 4. Comparison of image downscaling algorithms on the RealSR dataset using its “camera” images as the “ground truth”.

|             | SSIM $\uparrow$   | PSNR $\uparrow$    | LPIPS $\downarrow$ |
|-------------|-------------------|--------------------|--------------------|
| Bicubic     | $0.900 \pm 0.046$ | $29.870 \pm 2.857$ | $0.167 \pm 0.070$  |
| Bilinear    | $0.922 \pm 0.036$ | $30.163 \pm 2.907$ | $0.132 \pm 0.059$  |
| Lanczos     | $0.886 \pm 0.053$ | $28.072 \pm 2.837$ | $0.191 \pm 0.079$  |
| N.N.        | $0.827 \pm 0.078$ | $25.713 \pm 2.881$ | $0.247 \pm 0.105$  |
| $L_0$ -reg. | $0.858 \pm 0.071$ | $26.278 \pm 2.901$ | $0.228 \pm 0.099$  |
| DPID        | $0.869 \pm 0.065$ | $26.964 \pm 2.838$ | $0.225 \pm 0.098$  |
| Perceptual  | $0.840 \pm 0.085$ | $25.842 \pm 2.795$ | $0.239 \pm 0.102$  |

### 9. Test with Synthetic Downscaling Methods - Degradation Applied Before Downscaling

As Table 9 shows, it can be observed that applying degradation before downscaling yields similar results to applying

Table 5. Additional experiments of the Lanczos algorithm. (a)(b): extension to Table 7 of the main paper; (c) extension to Table 3(a) of the main paper.

|         | (a) FFHQ          | (b) AFHQ-Cat      | (c) RealSR        |
|---------|-------------------|-------------------|-------------------|
| Lanczos | $0.121 \pm 0.287$ | $0.142 \pm 0.045$ | $0.120 \pm 0.133$ |

degradation after downscaling. We therefore conclude that either approach yields valid synthetic downscaling methods.

### 10. Minimum Degradation that Causes Differences in IDA-RD Values

As Table 10 shows, the minimum degradations that cause differences in IDA-RD values (*e.g.*, for Gauss. Blur, when the degradation parameter changes from 0.0001 to 0.0005, the IDA-RD slightly increases from  $0.111 \pm 0.034$  to

Table 6. Examples of images downscaled by synthetic image downscaling methods, *i.e.*, those adds controllable degradations to bicubic-downscaled images (Sec. 4.2 in the main paper). The numbers below images are the degradation parameters. LR: bicubic-downscaled images, Dec.: decrease, Inc.: increase, Gauss.: Gaussian.

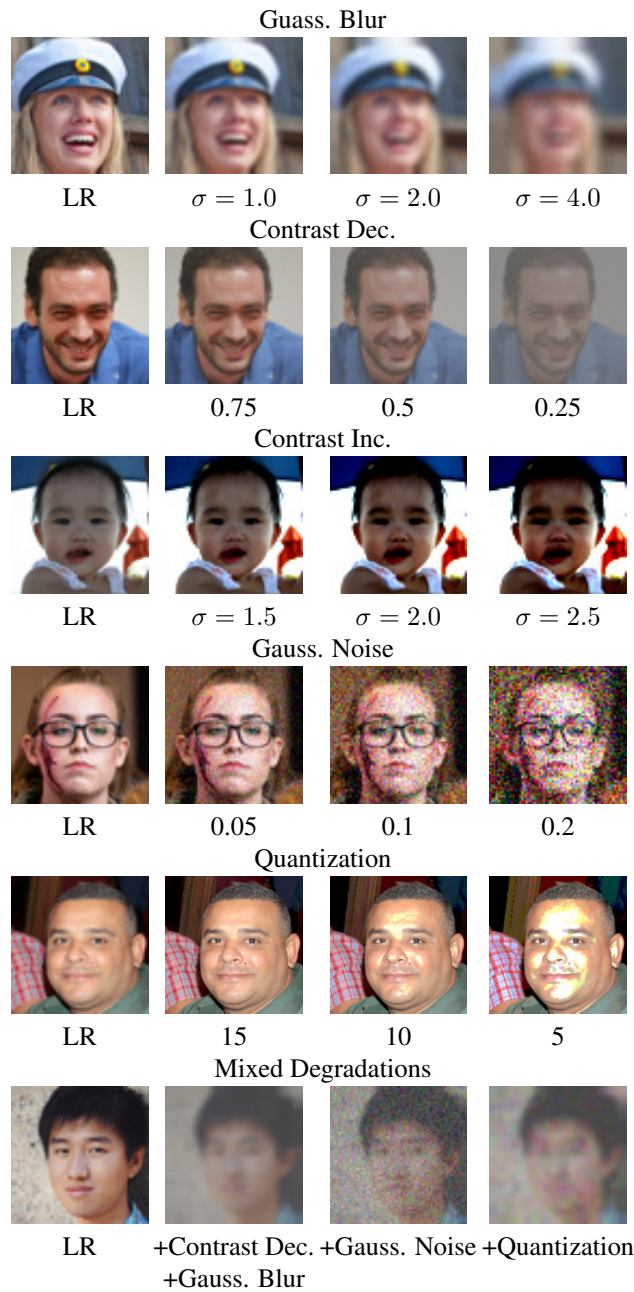

$0.112 \pm 0.034$ ), indicating that our IDA-RD is stable against small degradations. Note that the baseline IDA-RD, *i.e.*, no degradation, is 0.110.

## 11. Motivation Justification

As Table 11 shows, non-blind or non-stochastic SR methods are slightly better but still not comparable to SRFlow.

As Table 12 shows, existing NR-IQA metrics are not suitable for the image downscaling problem, especially extreme



Table 7. Examples of images downscaled by real-world image downscaling methods. N.N.: Nearest Neighbour; L0-reg.: L0-regularized.

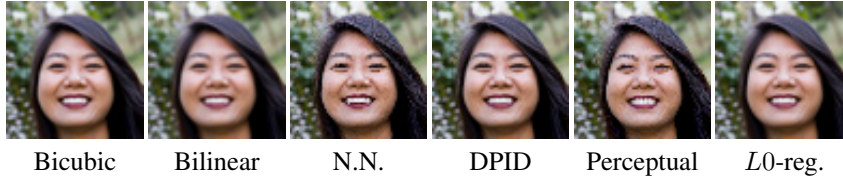

Table 8. Statistics of our balanced FFHQ subsets. MI: Minors, Y: Youth, MA: Middle Aged, S: Senior; A: Asian, W: White, B: Black; M: Male, F: Female. J.E.: Joint Entropy, which measures the extent to which a subset is balanced. As a reference, a fully-balanced subset has a joint entropy of  $-24 * (1/24) * \log_2(1/24) \approx 4.5850$ .

| Size | Age |     |     |     | Ethnicity |     |     | Gender |      | J.E.   |
|------|-----|-----|-----|-----|-----------|-----|-----|--------|------|--------|
|      | MI  | Y   | MA  | S   | A         | W   | B   | M      | F    |        |
| 30   | 6   | 9   | 7   | 8   | 10        | 10  | 10  | 15     | 15   | 4.2817 |
| 300  | 76  | 75  | 70  | 79  | 102       | 100 | 98  | 150    | 150  | 4.4998 |
| 600  | 168 | 142 | 141 | 149 | 200       | 194 | 206 | 329    | 271  | 4.5245 |
| 900  | 222 | 227 | 215 | 236 | 304       | 295 | 301 | 452    | 448  | 4.5343 |
| 1200 | 445 | 442 | 453 | 460 | 608       | 591 | 601 | 902    | 898  | 4.5375 |
| 1500 | 684 | 664 | 673 | 679 | 909       | 887 | 904 | 1352   | 1348 | 4.5386 |

downscaling.

## 12. Visualization of Existing Downscaling Methods

As Fig. 2 shows, state-of-the-art (SOTA) image downscaling methods improve the perceptual quality by selectively “enhancing” image features (DPID explicitly mentioned that it “assigns larger weights to pixels that deviate more from their local image neighborhood” [44]), *e.g.*, the glasses frames and clothes patterns in Fig. 2 (i-c,d,e,f); the tessellation gaps in Fig. 2 (ii-c,d,e,f); the hair and watermelon seeds (clothes pattern) in Fig. 2 (iii-c,d,e,f). Nevertheless, selectively “enhancing” perceptually-important features means downweighting all other features, resulting in higher uncertainty (*i.e.*, information loss) when reconstructing other features during SR. Since the number of perceptually-important features is typically less than the number of other features, SOTA image downscaling methods lose more information, resulting in higher IDA-RD scores. Please note that N. N. shares a similar idea but uses a very simple “selection” method, thus losing a large amount of information as well.

## 13. Qualitative Evaluation of Existing Downscaling Methods

As Fig. 3 shows, state-of-the-art image downscaling methods achieve better perceptual quality by “exaggerating” perceptually important features in the original image (*e.g.*, building lights, water reflections), thus leading to over-exaggeration

in the upscaled images. As a result, they have lower IDA-RD scores than bicubic and bilinear downscaling.

## 14. Limitation and Future Work

**Limitations.** Since our measure makes use of GAN- and Flow-based super-resolution (SR) models, the limitations of these models are carried over as well. First of all, we cannot use test data beyond the learnt distribution of the SR model. For example, unlike the SRFlow [24] model trained on general images that are used in the main paper, our GAN-based implementation uses a StyleGAN generator pre-trained on portrait images, which only allows for the use of portrait face images to evaluate downscaling algorithms. Also, although highly unlikely to occur, we cannot evaluate downscaling algorithms whose output images are of higher quality than those generated by the SR model (*i.e.*, no distortion).

**Future work.** Our framework still requires a ground truth HR image. However, we believe the distortion can be calculated without such a ground truth image. To further validate our IDA-RD measure, in the future we will use the *meta-measure* methodology [11, 32], in which secondary, easily quantifiable measures are constructed to quantify the performance of a less easily quantifiable measure.

Table 9. IDA-RD scores for synthetic image downscaling with different types and levels of degradations (degradation applied before downscaling). The numbers in parentheses denote degradation parameters.

|        | Gauss. Blur | Gauss. Noise       | Contrast Inc.     | Contrast dec.      | Quantization     |
|--------|-------------|--------------------|-------------------|--------------------|------------------|
| (1.0)  | 0.321±0.048 | (0.05) 0.480±0.031 | (1.5) 0.234±0.042 | (0.75) 0.330±0.047 | (15) 0.162±0.015 |
| (2.0)  | 0.432±0.050 | (0.10) 0.64±0.052  | (2.0) 0.317±0.043 | (0.50) 0.644±0.070 | (10) 0.205±0.013 |
| (3.0)  | 0.579±0.055 | (0.20) 0.658±0.052 | (2.5) 0.462±0.043 | (0.25) 0.669±0.034 | (5) 0.464±0.054  |
| Spear. | 1.000       | 1.000              | 1.000             | -1.000             | -1.000           |

Table 10. The minimum degradations that cause differences in IDA-RD values. The numbers in parentheses denote degradation parameters.

|          | Gauss. Blur | Gauss. Noise         | Contrast Inc.       | Contrast dec.       | Quantization     |
|----------|-------------|----------------------|---------------------|---------------------|------------------|
| (0.0001) | 0.111±0.034 | (0.0001) 0.110±0.029 | (1.001) 0.111±0.034 | (0.999) 0.111±0.034 | (19) 0.111±0.035 |
| (0.0005) | 0.112±0.034 | (0.0005) 0.110±0.029 | (1.005) 0.111±0.034 | (0.995) 0.111±0.034 | (18) 0.182±0.038 |
| (0.0010) | 0.113±0.035 | (0.0010) 0.118±0.054 | (1.010) 0.115±0.029 | (0.990) 0.112±0.031 | (17) 0.193±0.041 |
| (0.0050) | 0.113±0.035 | (0.0030) 0.118±0.062 | (1.050) 0.120±0.032 | (0.950) 0.113±0.032 | ---              |
| (0.0100) | 0.113±0.036 | (0.0040) 0.203±0.062 | (1.100) 0.126±0.029 | (0.900) 0.119±0.032 | ---              |
| (0.0500) | 0.114±0.034 | (0.0050) 0.291±0.062 | (1.150) 0.126±0.029 | (0.850) 0.123±0.031 | ---              |
| (0.1000) | 0.118±0.042 | (0.0100) 0.318±0.061 | (1.200) 0.130±0.029 | (0.800) 0.131±0.032 | ---              |
| (0.2500) | 0.202±0.043 | ---                  | ---                 | ---                 | ---              |
| (0.3000) | 0.214±0.044 | ---                  | ---                 | ---                 | ---              |
| Spear.   | 0.983       | 0.982                | 0.982               | -0.991              | -1.000           |

Table 11. Invalidity of using ESRGAN, SR3, BSRGAN, RSR and Real-ESRGAN in our IDA-RD measure.

|             | Bicubic     | Bilinear    | N.N.        | DPID        | Perceptual  | L0-reg.     |
|-------------|-------------|-------------|-------------|-------------|-------------|-------------|
| ESRGAN      | 0.022±0.012 | 0.017±0.006 | 0.058±0.016 | 0.025±0.009 | 0.024±0.004 | 0.024±0.007 |
| BSRGAN      | 0.010±0.008 | 0.011±0.008 | 0.024±0.022 | 0.013±0.011 | 0.025±0.018 | 0.011±0.008 |
| Real-ESRGAN | 0.014±0.010 | 0.015±0.011 | 0.026±0.022 | 0.016±0.012 | 0.026±0.017 | 0.017±0.013 |
| SR3         | 0.169±0.048 | 0.164±0.047 | 0.179±0.040 | 0.171±0.044 | 0.172±0.043 | 0.171±0.049 |
| RSR         | 0.231±0.071 | 0.208±0.095 | 0.423±0.132 | 0.288±0.099 | 0.379±0.123 | 0.231±0.071 |

Table 12. Results of NIQE, BRISQUE, MANIQA and CONTRIQUE at higher resolutions.

| Resolution | LR     | $\sigma = 1.0$ | $\sigma = 2.0$ | $\sigma = 4.0$ |
|------------|--------|----------------|----------------|----------------|
| 1024×1024  | 3.700  | 4.158          | 5.173          | 6.471          |
| 512×512    | 2.406  | 3.959          | 5.574          | 6.299          |
| 256×256    | 3.047  | 4.611          | 7.133          | 6.792          |
| 128×128    | 18.873 | 18.872         | 18.870         | 18.869         |
| 64×64      | 18.872 | 18.872         | 18.870         | 18.869         |
| 32×32      | 18.873 | 18.869         | 18.870         | 18.867         |

(a) NIQE scores (lower is better)

| Resolution | LR    | $\sigma = 1.0$ | $\sigma = 2.0$ | $\sigma = 4.0$ |
|------------|-------|----------------|----------------|----------------|
| 1024×1024  | 0.513 | 0.481          | 0.475          | 0.475          |
| 512×512    | 0.624 | 0.614          | 0.612          | 0.612          |
| 256×256    | 0.679 | 0.676          | 0.6762         | 0.676          |

(c) MANIQA scores (higher is better)

| Resolution | LR     | $\sigma = 1.0$ | $\sigma = 2.0$ | $\sigma = 4.0$ |
|------------|--------|----------------|----------------|----------------|
| 1024×1024  | 26.792 | 32.827         | 48.971         | 59.043         |
| 512×512    | 19.536 | 33.391         | 57.447         | 63.144         |
| 256×256    | 28.582 | 39.282         | 55.747         | 65.990         |
| 128×128    | 16.045 | 34.423         | 47.017         | 55.166         |
| 64×64      | 41.360 | 42.417         | 43.346         | 54.344         |
| 32×32      | 43.458 | 43.458         | 44.015         | 43.668         |

(b) BRISQUE scores (lower is better)

| Resolution | LR     | $\sigma = 1.0$ | $\sigma = 2.0$ | $\sigma = 4.0$ |
|------------|--------|----------------|----------------|----------------|
| 1024×1024  | 54.989 | 33.965         | 32.037         | 32.114         |
| 512×512    | 64.600 | 52.143         | 49.588         | 49.588         |
| 256×256    | 57.145 | 55.847         | 55.538         | 55.538         |
| 128×128    | 50.782 | 50.595         | 50.557         | 50.557         |
| 64×64      | 55.608 | 55.591         | 55.577         | 55.577         |
| 32×32      | 54.569 | 54.572         | 54.568         | 54.568         |

(d) CONTRIQUE scores (higher is better)

Figure 2. Examples of images ( $\times 8$ ) from FFHQ, DIV2K and Flickr30K datasets downsampled by real-world image downscaling methods. (a) Bicubic (b) Bilinear (c) Nearest Neighbor (N.N.) (d) DPID (e) Perceptual (f)  $L_0$ -regularized

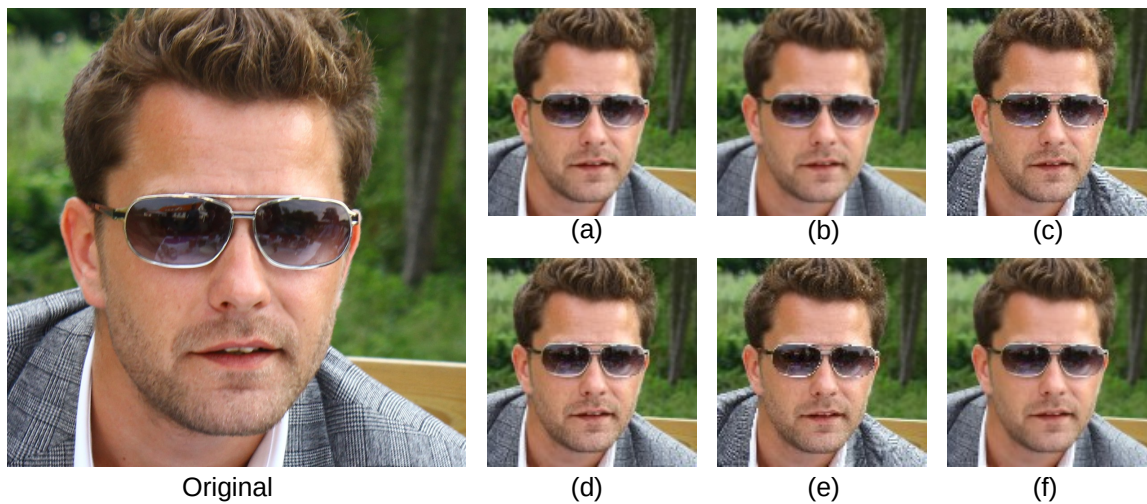

(i) Example from FFHQ

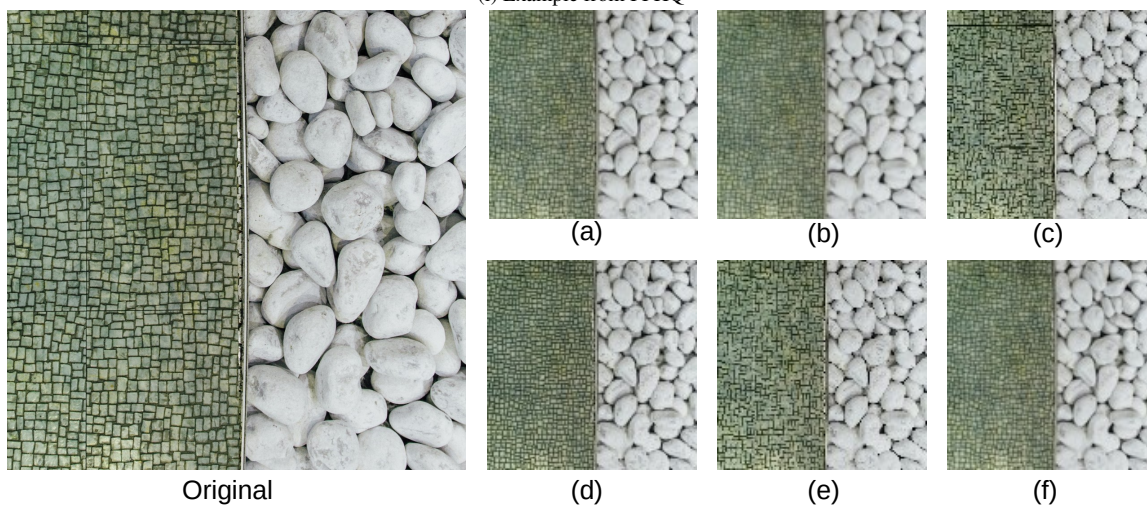

(ii) Example from DIV2K

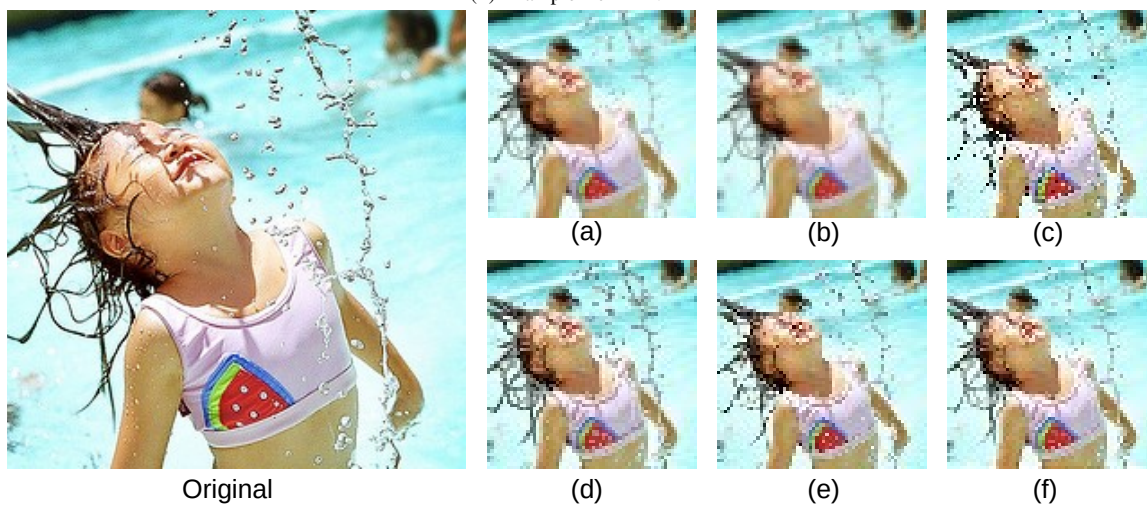

(iii) Example from Flickr30K



Figure 3. Qualitative evaluation of existing image downscaling methods. Original: the input HR image; LR: the downscaled LR image; SR1, SR2, SR3: three instances of upscaled images; MD1, MD2, MD3: difference map visualizations of (SR1, Original), (SR2, Original), and (SR3, Original), respectively. The white numbers on the left-top corners: the corresponding LPIPS scores of the difference map visualizations. State-of-the-art image downscaling methods (DPID, Perceptual and  $L0$ -reg.) achieve better perceptual quality by “exaggerating” perceptually important features in the original image (e.g., building lights, water reflections), thus leading to over-exaggeration in the upscaled images and lower IDA-RD scores.

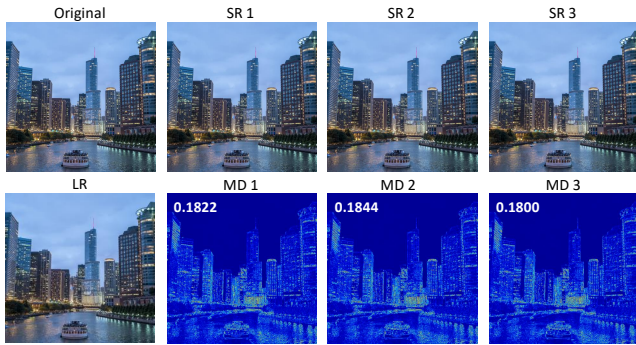

(a) Bicubic

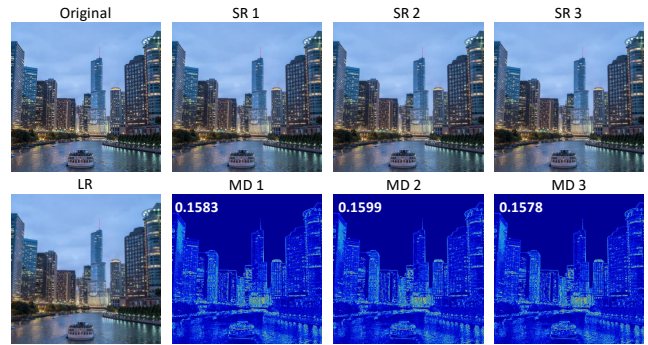

(b) Bilinear

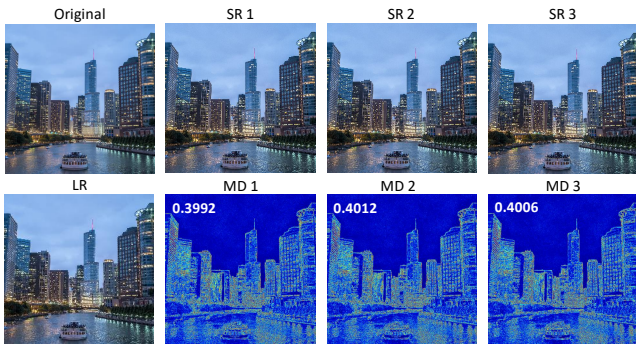

(c) N.N.

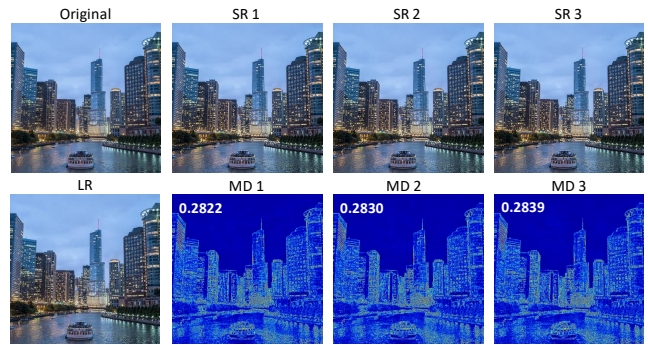

(d) DPID

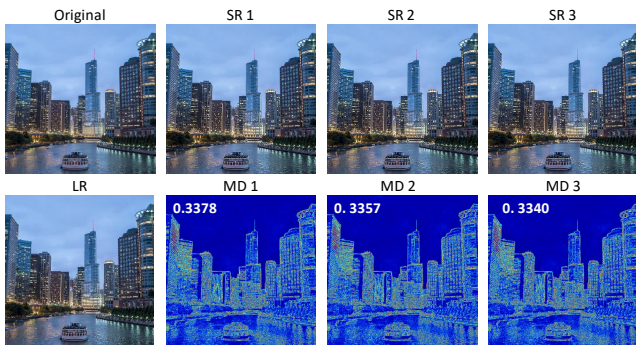

(e) Perceptual

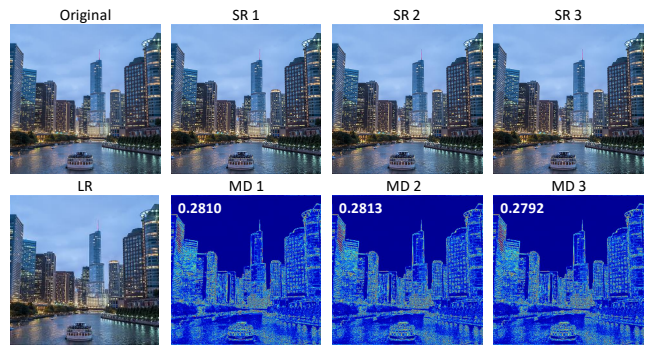

(f)  $L0$ -reg.
